# Supplementary material
Source: HighWire-hosted journal article supplement (https://genome.cshlp.org/content/suppl/2007/05/23/17.6.865)
Supplement: Karnani_et_al1.06_Suppl._SECREV.pdf [file Karnani_et_al1.06_Suppl._SECREV.pdf]

## SUPPLEMENTARY DATA LEGENDS

**Suppl. Figure 1.** TR50 and Segmentation profiles for 12 of the ENCODE regions.

**Suppl. Figure 2.** Mid-Scores are elevated when two alleles of a gene replicate asynchronously in the same cell.

The Mid-Score for a time point is the percentage of cells that have replicated at least one, but not all alleles for the given probe. Thus it is the percentage of cells where  $G1 \text{ dots/cell} < \text{actual dots/cell} < G2 \text{ dots/cell}$ . For a locus with two alleles, G1 cells will have 2 dots/cell while G2 cells will have 4 dots/cell. Thus, the mid-score for a given time point is the percentage of cells with 3 dots/cell.

For an early replicating locus with synchronous alleles (i.e. Early-SA), the two alleles replicate together in an early time point. The mid-score is always 5%, since 5% of the cells (background) have 3 dots/cell in all of the time points.

For a Pan-S replicating locus with synchronous alleles (i.e. Pan-S-SA), the two alleles replicate together in a given cell, but intercellular asynchrony results in some cells replicating their two alleles in each time point. Since the alleles replicate synchronously in a given cell, this locus also gives a 5% mid-score (background) for all time points.

Contrast this with a Pan-S replicating locus with asynchronous alleles (Pan-S-AA). In this case the two alleles replicate asynchronously (interallelic asynchrony), one replicating earlier than the other. Here the majority of the cells replicate their first allele at an early time point (say 0-2 hr) and then the majority of the cells replicate their second allele in a later time point (say 6-8 hr). The Mid-Score starts at 5% (background) but

then jumps to 85% at the 2 hr time point, because 85% of the cells have replicated exactly one allele. The mid-score stays at 85% until the 6 hr time point when the second allele replicates and the mid-score drops to 5% again at the 8 hr time point.

**Suppl. Figure 3.** Comparison of two methods of analyzing replication data for ENm001.

The upper panel shows UCSC genome browser generated image representing the two sample based analyses of replication timing for ENm001 used in (Jeon et al., 2005). Each track shows the significant enrichment of replication signal in indicated 2 hr interval relative to the 0-10 hr interval. The bottom track labeled pan-S indicates the chromosomal regions that appeared to have replication signal in more than one time interval of S-phase. The lower panel shows the new probe-by-probe method of analyzing replication signal for ENm001.

**Suppl. Figure 4.** Replication timing of chromosome X. **(A)** Panel 1: UCSC genome browser displaying replication profile of a 1.2 Mb region of chromosome X (ENm006). Panel 2: This browser picture details the genes (track I) and replication time (track II) of a 62kb pan-S replicating region from ENm006. **(B)** UCSC genome browser displaying replication profile of a 500kb region of chromosome X (ENr324).

**Suppl. Table 1.** Examples of the TR50 calculation and temporal specificity classification.

Probe 1 is classified as temporally specific because the 0-2 hour time point contains all of the signal. Hence, probe 1 passes either criterion for temporal specificity. For example, the 0-2 hour time point contains at least twice the signal of any of the other four time

points. So probe 1 clearly passes the first criterion. Probe 3 is classified as temporally specific due to the second criterion. That is, the sum of the 2-4 and 4-6 hour time points is 200, which is at least three times any of the other three time points. Probe 3 does not pass the first criterion, but it only needs to pass one of the criteria to be called temporally specific. Probes 2 and 4 are classified as temporally non-specific because they do not pass either of the criteria for specificity.

**Suppl. Table 2.** Interphase FISH probes from ENCODE regions are listed alongside FISH results of replication time in HeLa cells released from thymidine/aphidicolin block or nocodazole block or in MCF10A cells released from thymidine/aphidicolin block. The classification of the same regions on the microarrays as early, mid or late-S-phase or pan-S-phase is indicated. Blank cells: not determined

**Suppl. Table 3.** Primer details for chromatin immunoprecipitation assay.

chr5:131284314-132284313 (ENm002: Interleukin\_cluster)

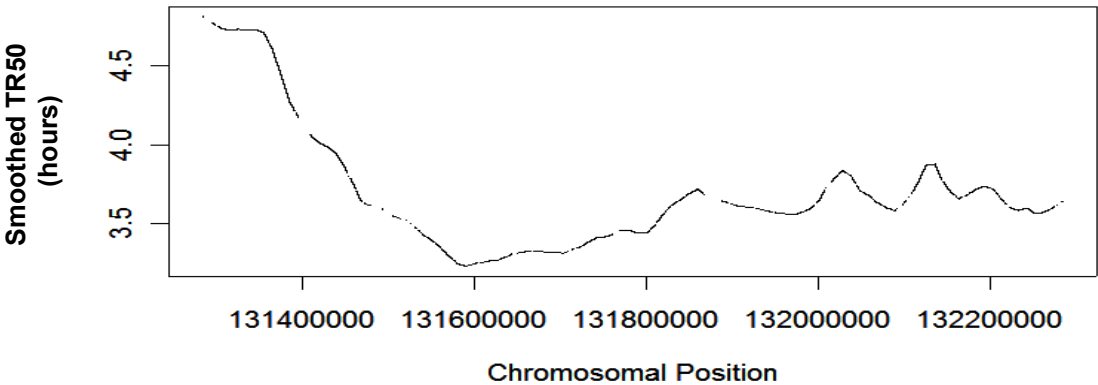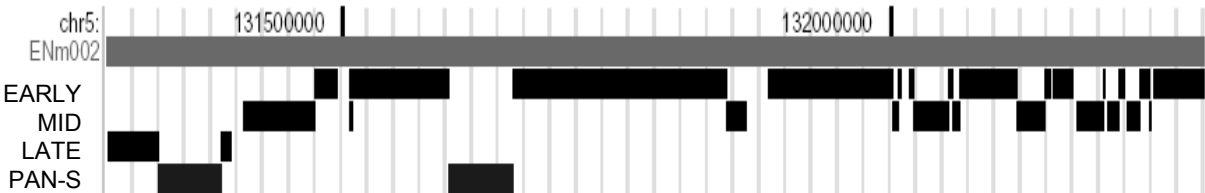

chr11:115962316-116462315 (ENm003: Apo\_cluster)

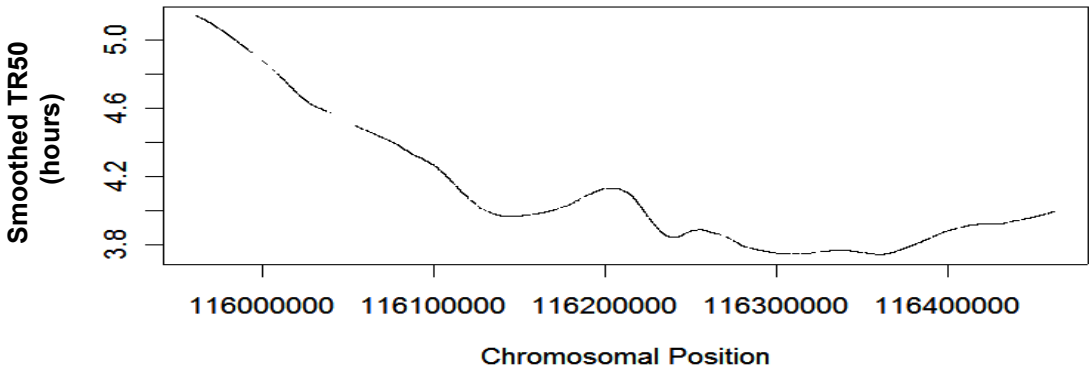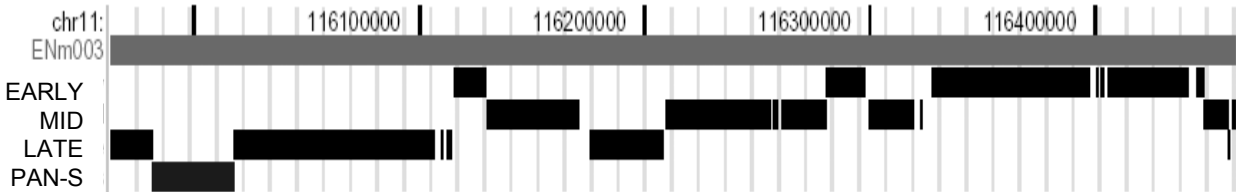

chr7:26730761-27230760 (ENm010: HOXA\_cluster)

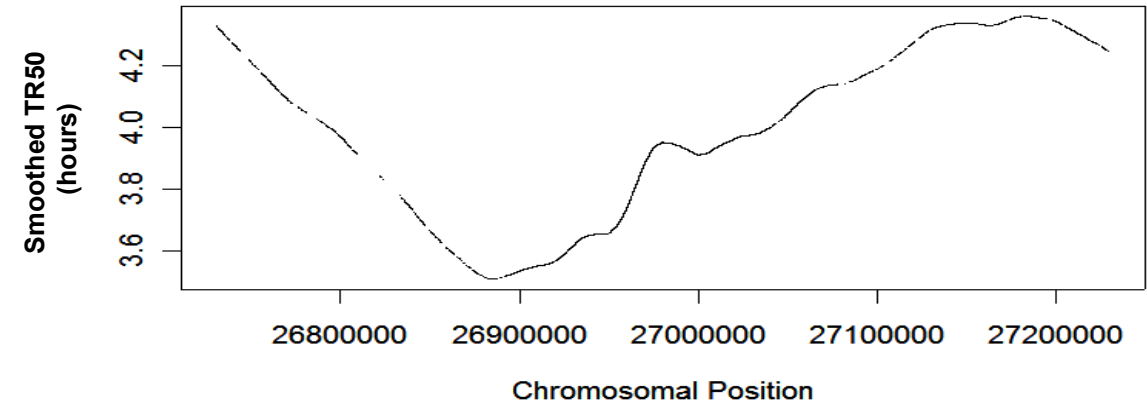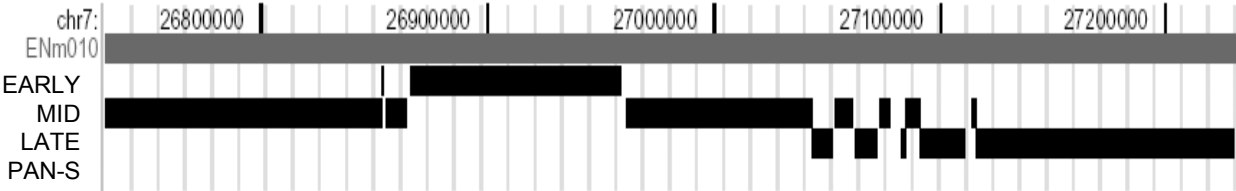

chr13:29418016-29918015 (ENr111)

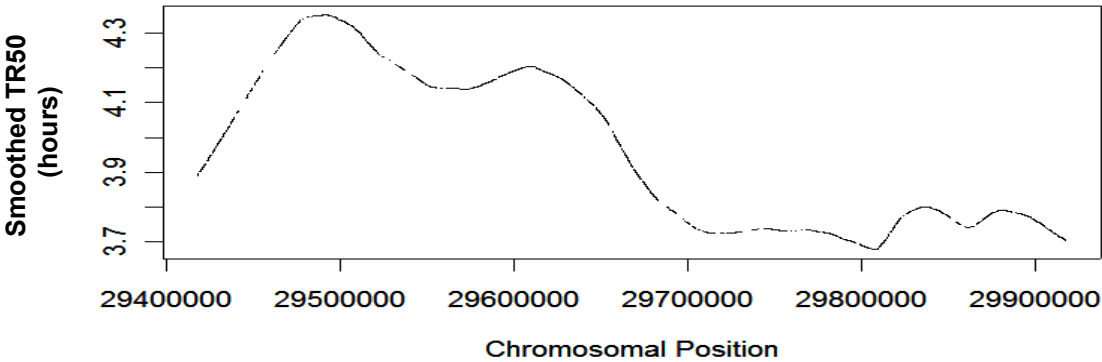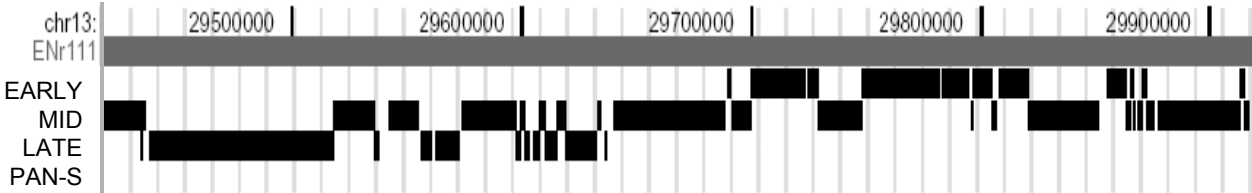

chr2:118,010,804-118,510,803 (ENr121)

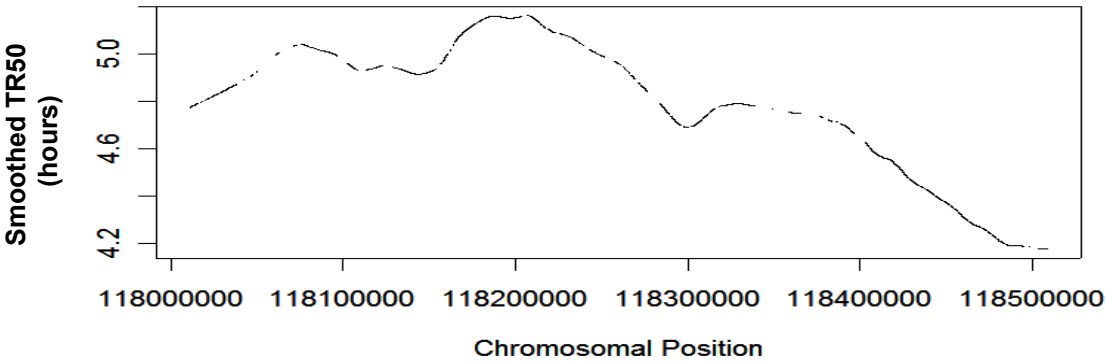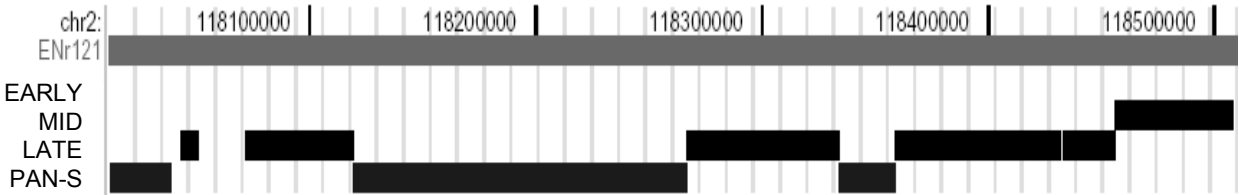

chr2:234273825-234773888 (ENr131)

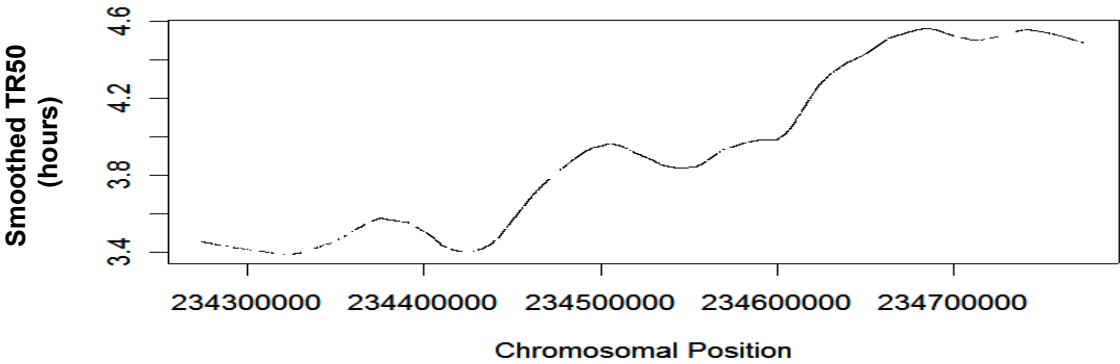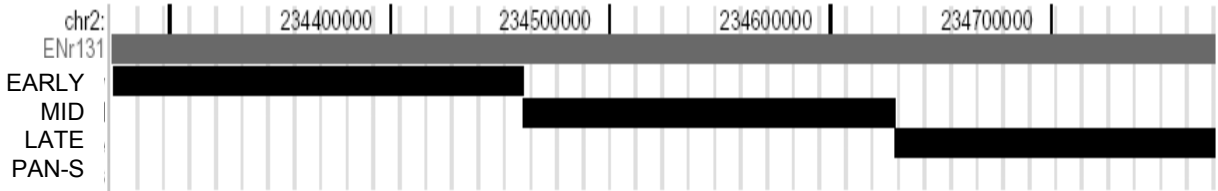

chr16:25780428-26280428 (ENr211)

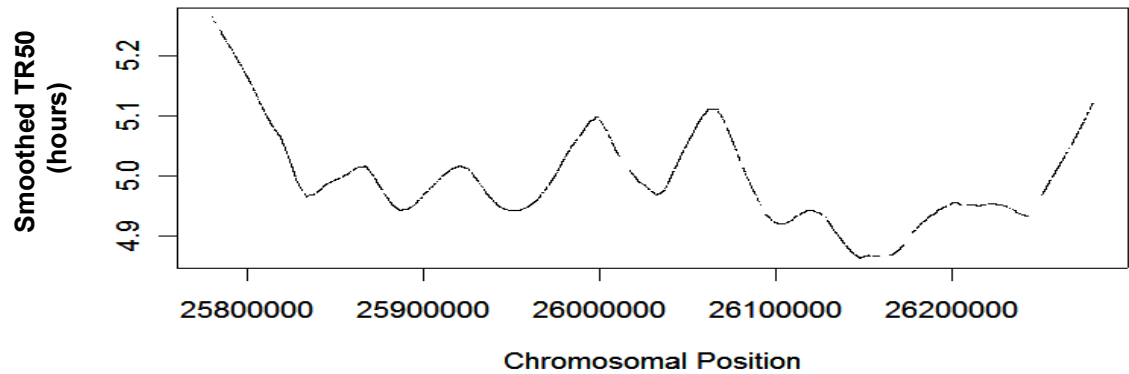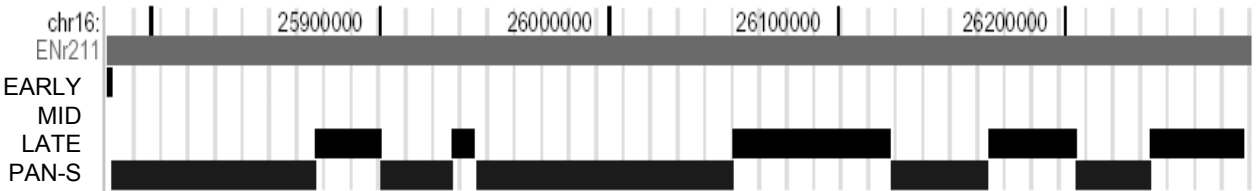

chr5:55871007-56371006 (ENr221)

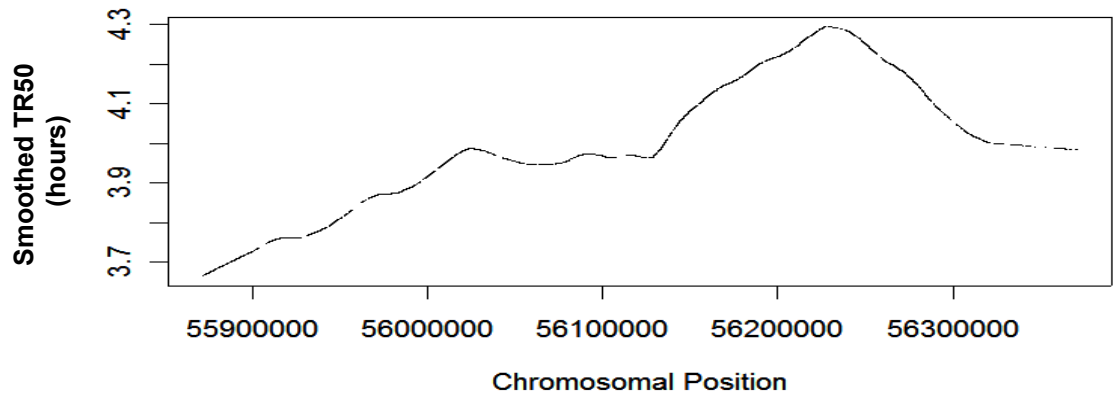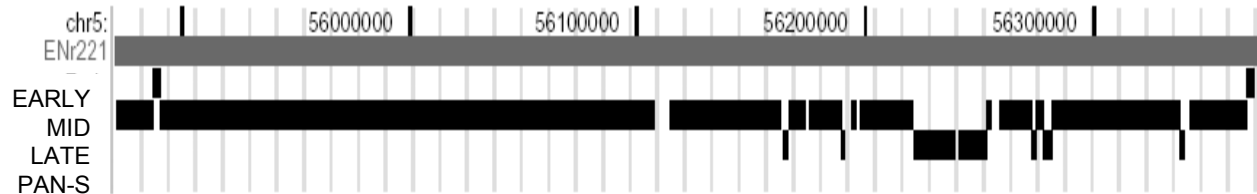

chr1:147971134-148471133 (ENr231)

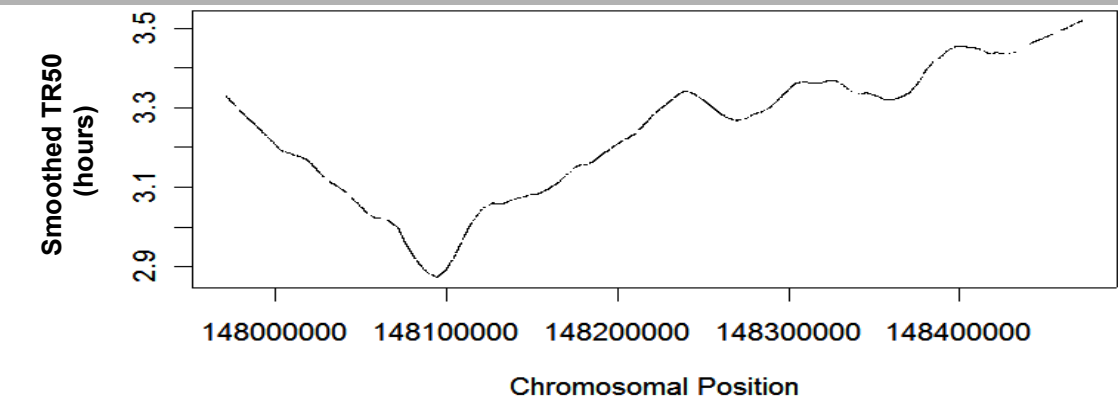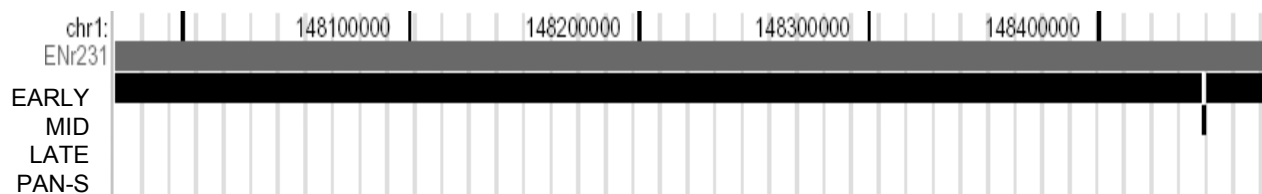

chr14:52,947,076-53,447,075 (ENr311)

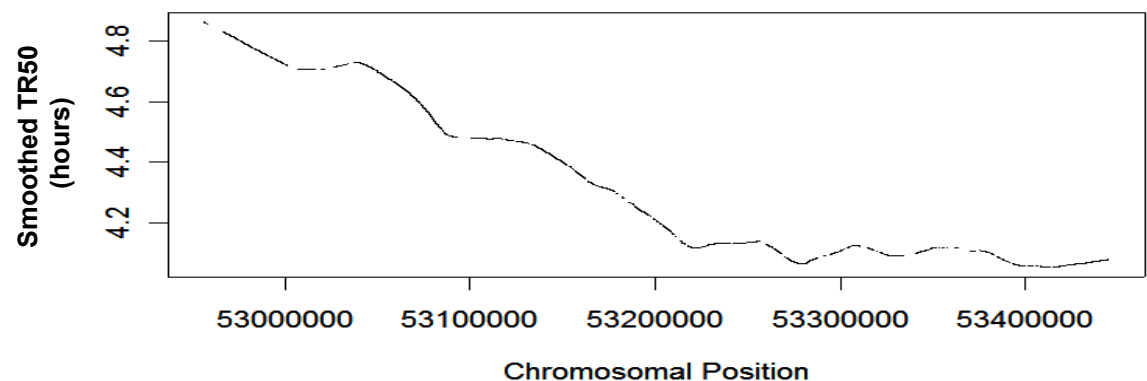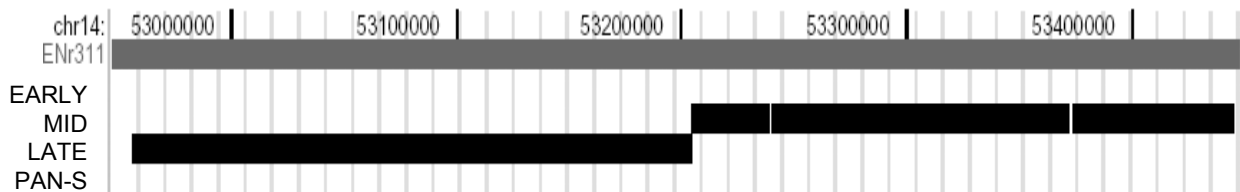



chr8:118882221-119382220 (ENr321)

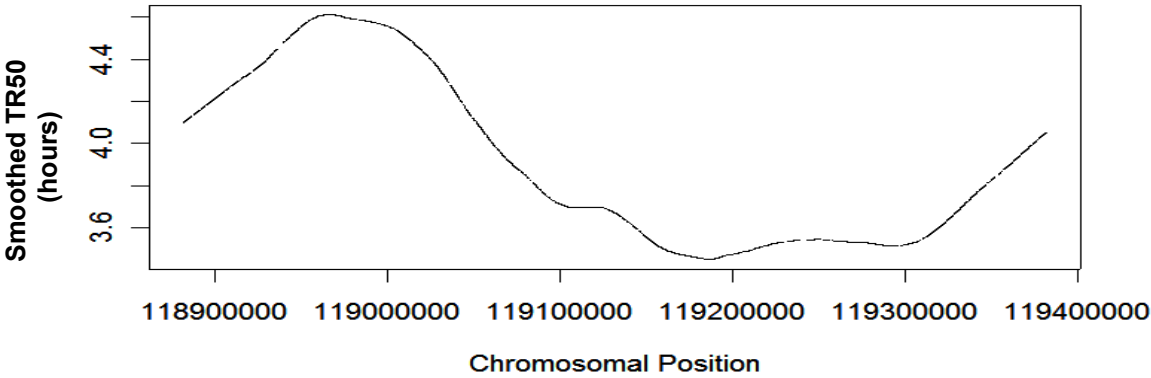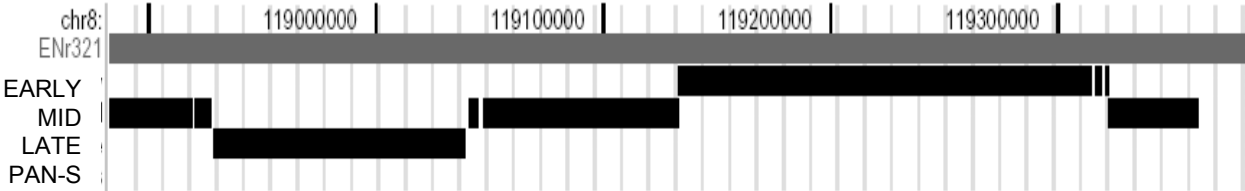

chr2:220102851-220602850 (ENr331)

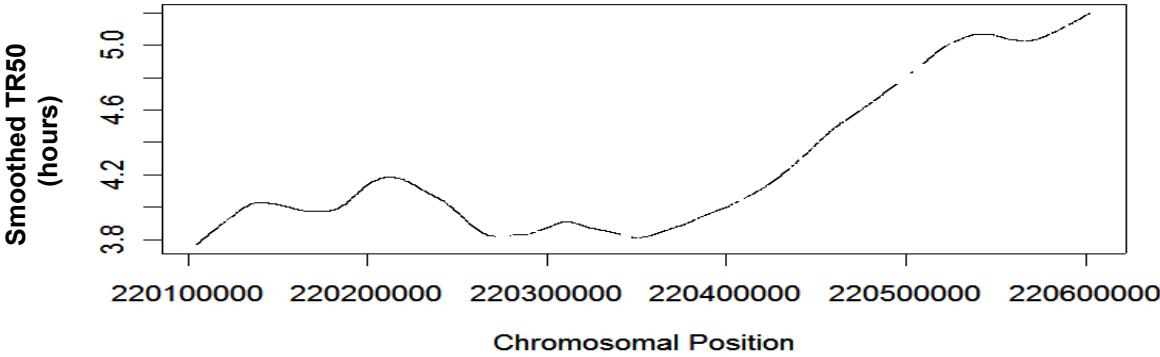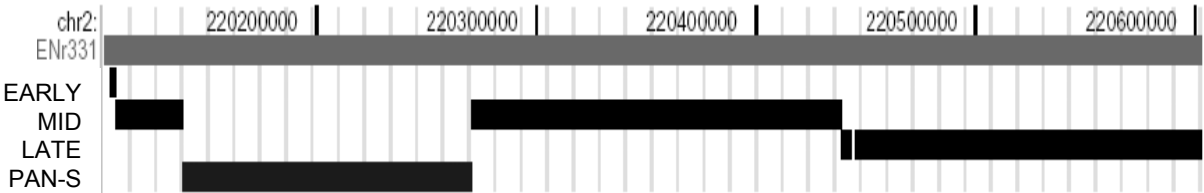

Karnani et al., Suppl. Figure 2

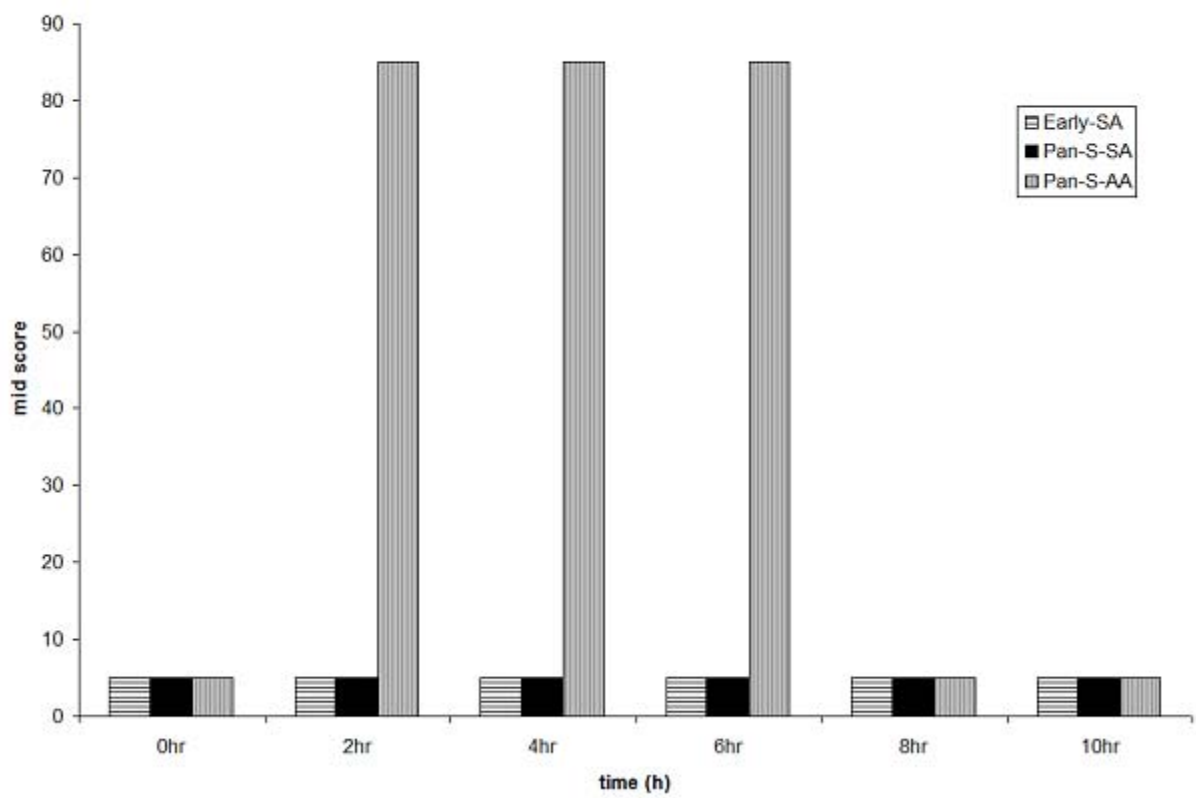

GTRANS based analysis (old method)

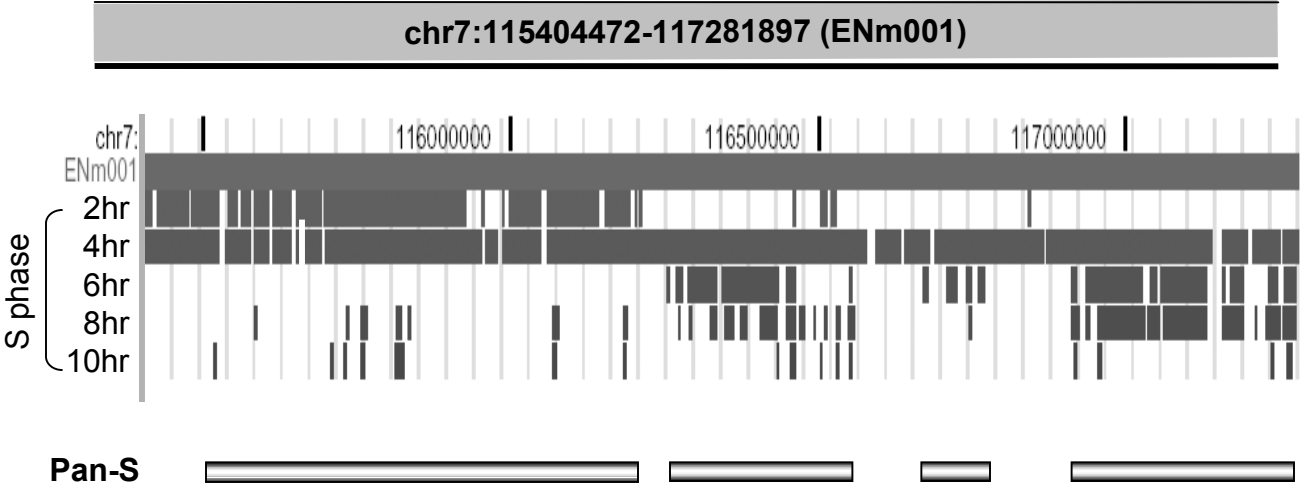

Segregation based analysis (new method)

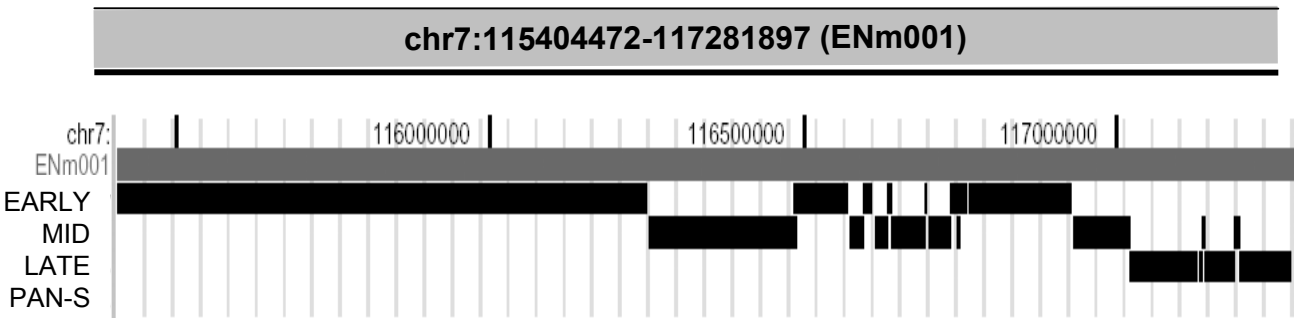

A.

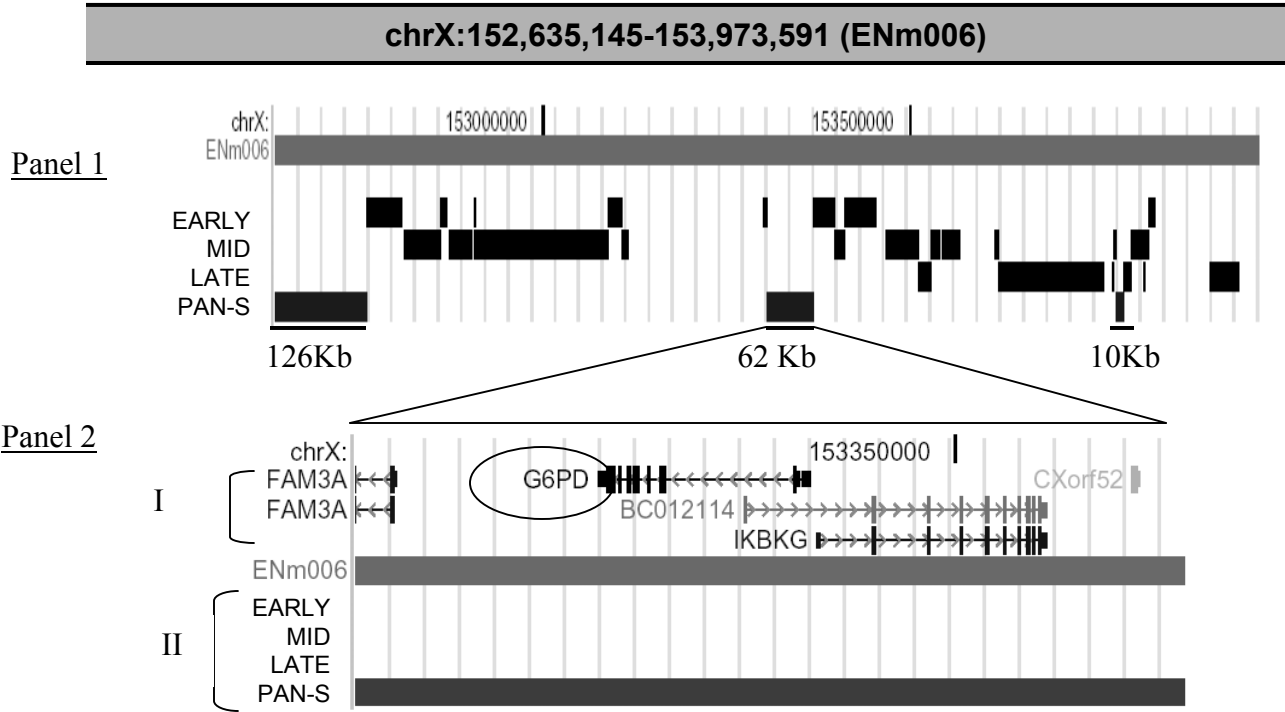

B.

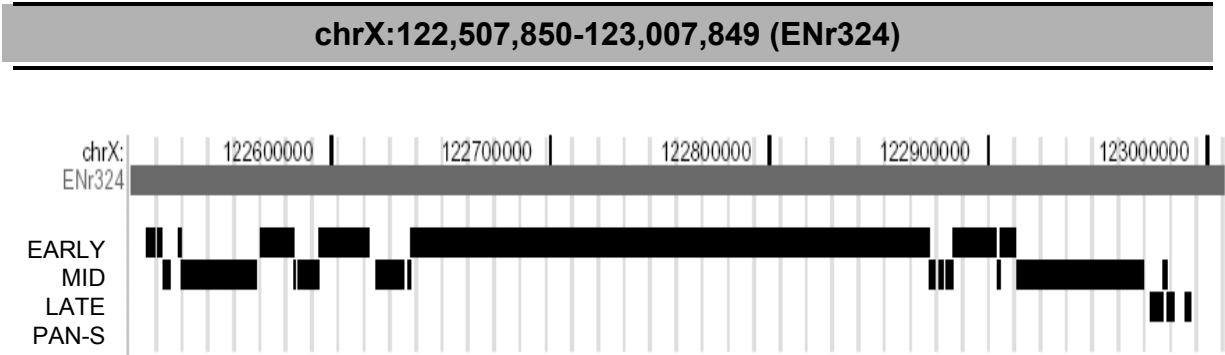

| Probe   | PM-MM Replication Score |              |              |              |               |              | TR50   | Temporal Specificity |
|---------|-------------------------|--------------|--------------|--------------|---------------|--------------|--------|----------------------|
|         | <i>0-2hr</i>            | <i>2-4hr</i> | <i>4-6hr</i> | <i>6-8hr</i> | <i>8-10hr</i> | <i>Total</i> |        |                      |
| Probe 1 | 200                     | 0            | 0            | 0            | 0             | 200          | 1.00hr | Specific             |
| Probe 2 | 100                     | 100          | 0            | 100          | 0             | 300          | 3.00hr | Non-Specific         |
| Probe 3 | 0                       | 100          | 100          | 50           | 0             | 250          | 4.50hr | Specific             |
| Probe 4 | 80                      | 60           | 0            | 0            | 100           | 240          | 3.33hr | Non-Specific         |

**Karnani et al., Suppl. Table 2**

| ENCODE<br>Region | FISH<br>Clone | Chromosome<br>No. | Chromosome<br>Position   | FISH RESULT        |               |                      | ARRAY RESULT               |
|------------------|---------------|-------------------|--------------------------|--------------------|---------------|----------------------|----------------------------|
|                  |               |                   |                          | HELA<br>(APHI/THY) | HELA<br>(NOC) | MCF10A<br>(APHI/THY) | HELA (APHI/THY)            |
| ENm001           | RP11-51M22    | 7                 | 115435013 -<br>115597337 | EARLY              | EARLY         | EARLY                | EARLY                      |
| ENm005           | RP11-54F16    | 21                | 32694022 -<br>32849422   | EARLY + MID        |               |                      | EARLY+MID                  |
| ENr331           | RP11-316O14   | 2                 | 220032424 -<br>220216048 | EARLY              | EARLY         | LATE                 | EARLY + PANS               |
| ENr112           | RP11-18019    | 2                 | 51942654 -<br>52109389   | LATE               |               |                      | LATE                       |
| ENm005           | RP11-79D9     | 21                | 33204657 -<br>33369197   | LATE               |               |                      | MOSTLY LATE                |
| ENr313           | RP11-3I14     | 16                | 61098254 -<br>61253550   | LATE               | LATE          | LATE                 | LATE                       |
| ENr111           | RP11 90M5     | 13                | 29310416 -<br>29471953   | LATE               |               |                      | LATE                       |
| ENm004           | RP1-127L4     | 22                | 30829975 -<br>30877786   | PAN S              |               |                      | PANS AND LATE              |
| ENr132           | RP11-88E10    | 13                | 112208159 -<br>112395315 | PAN S              | PANS          | PAN S                | MOSTLY PANS +<br>SOME LATE |
| ENm008           | RP11-243K18   | 16                | 266994 -<br>431803       | PANS               | PAN S         | EARLY                | MOSTLY PANS,<br>SOME EARLY |

Karnani et al., Suppl. Table 3

|    | Primer  | Chromosome position       | Amplicon size | Sequence (5'→3')                          |
|----|---------|---------------------------|---------------|-------------------------------------------|
| 1  | 005HM1F | chr21:32686521-32686813   | 293bp         | G T A T G A G T G T T G G G G G A T G G   |
| 2  | 005HM1R |                           |               | T G A G G T T C A G G A C T G C T G T G   |
| 3  | 005HM2F | chr21:33022187-33022292   | 106bp         | G T C A C T T C C G C T C C A G C A       |
| 4  | 005HM2R |                           |               | G T G G T C T C C C T C C T G A T G C     |
| 5  | 005HM3F | chr21:33066160-33066267   | 108bp         | G A G A G A G A G A G A G C C C C A C A   |
| 6  | 005HM3R |                           |               | T G A C C T G T C A A A C A A C A C C A G |
| 7  | 005HM4F | chr21:33319521-33319737   | 217bp         | C C A C G T G T T G A T G A A A C C A G   |
| 8  | 005HM4R |                           |               | A A T A C G G C C A C C A C A G A G T C   |
| 9  | 005HM5F | chr21:33363802-33364027   | 226bp         | T T A A T G G G T G G A G C T T C A G G   |
| 10 | 005HM5R |                           |               | C C T T C C T C C A G C A A C T G T C T   |
| 11 | 005HM6F | chr21:33618899-33619020   | 122bp         | C A T A G G C C G G A A A G A G T G A G   |
| 12 | 005HM6R |                           |               | T A G C T A G C A C C C C T T C T C C A   |
| 13 | 005HM7F | chr21:33836675-33836809   | 135bp         | C A T C C G G C C T A T T G C T A A A A   |
| 14 | 005HM7R |                           |               | G A T A T G C A T C C G G G A G A G A A   |
| 15 | 005HM8F | chr21:33936279-33936457   | 179bp         | T A G T G T C T C T C A C G G C A A C G   |
| 16 | 005HM8R |                           |               | C A G A G T G A C A A G C C G A A T G A   |
| 17 | 005HM9F | chr21:34210077-34210183   | 107bp         | C G G G C T G G G A G T T G T A G T T     |
| 18 | 005HM9R |                           |               | C G C T T G G C C A G T A A C A A T G     |
| 19 | 132HM1F | chr13:112390183-112390371 | 189bp         | G C A G C A G G A T T T T G G T G A A T   |
| 20 | 132HM1R |                           |               | A A T G C T C C T T T T T C C C T G G T   |
| 21 | 132HM2F | chr13:112395710-112395881 | 172bp         | G G G T G A T G T A T G T G C T G T C G   |
| 22 | 132HM2R |                           |               | C A A C A C A T A C G C C A G T C C A C   |
| 23 | 132HM3F | chr13:112647902-112648128 | 227bp         | G C C T T T T T G A C C T T G A G C A G   |
| 24 | 132HM3R |                           |               | T G T C A G T G C C A A C C C A A T T A   |
